# Supplementary material for: RNA-seq analyses of multiple meristems of soybean: novel and alternative transcripts, evolutionary and functional implications
Source: PubMed Central journal article supplement (PMC4070088; doi:10.1186/1471-2229-14-169), 2014-06-17

Figure S1

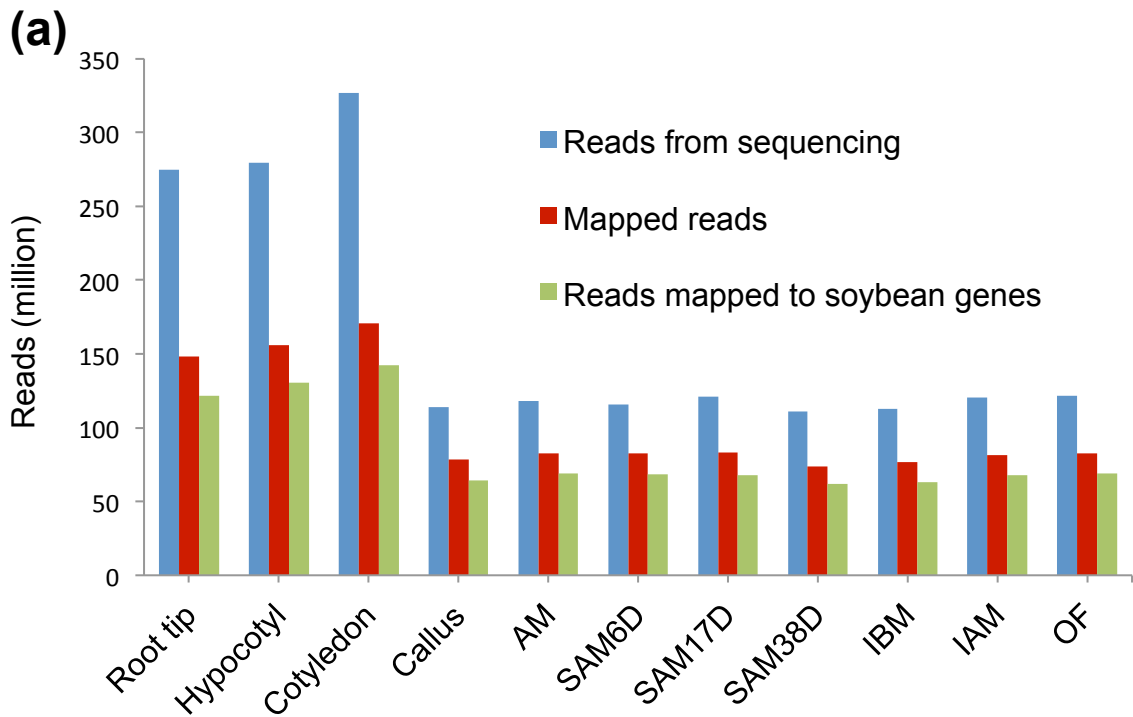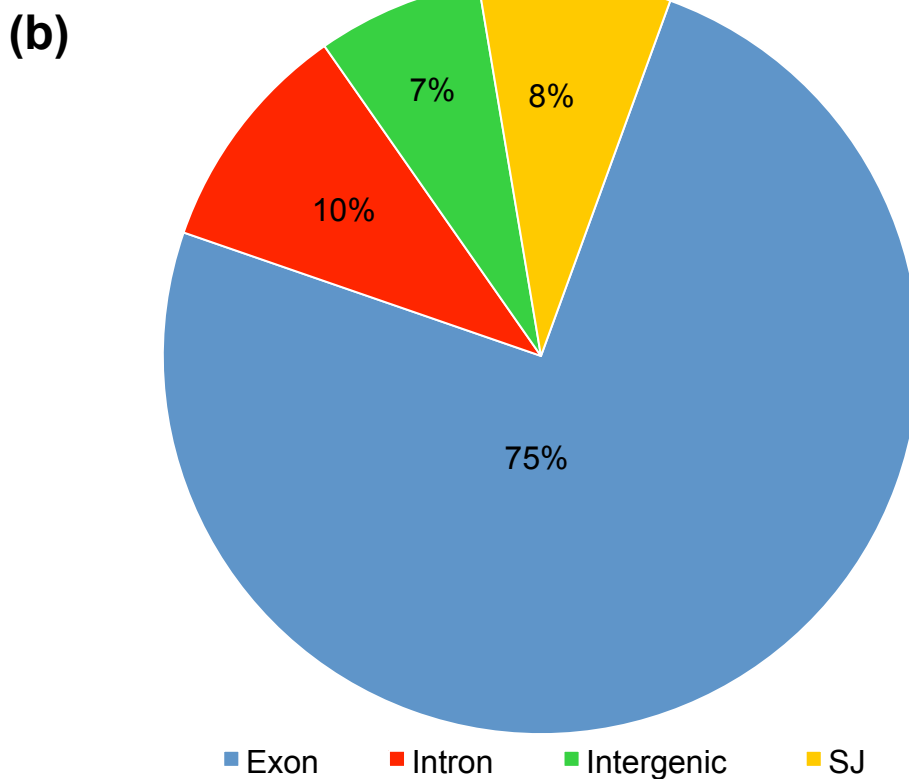

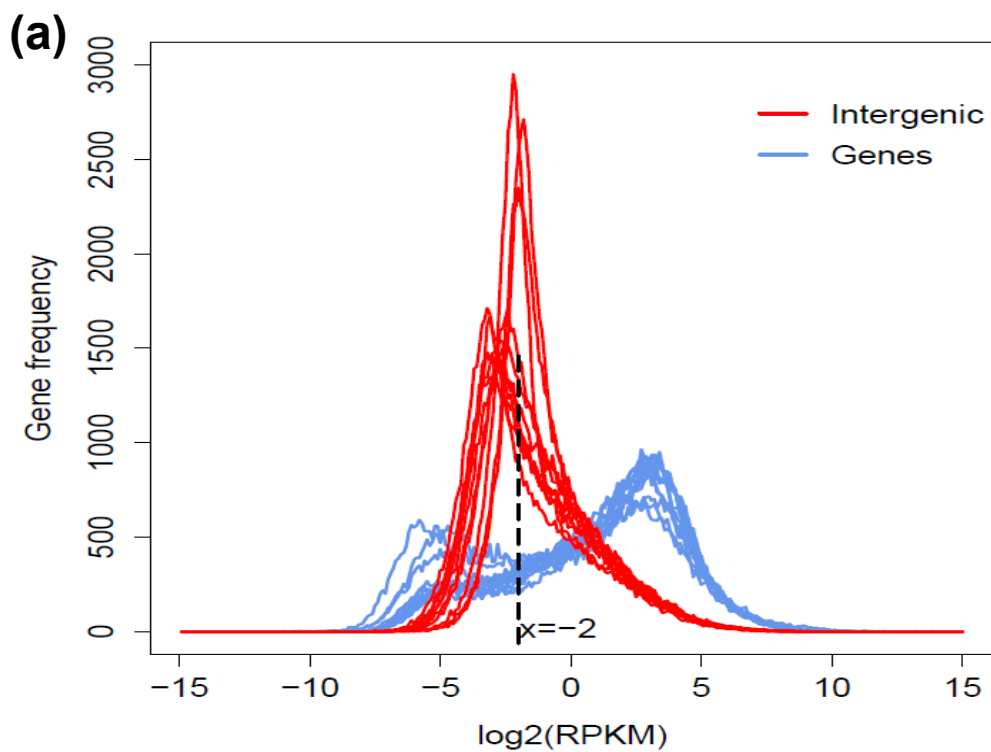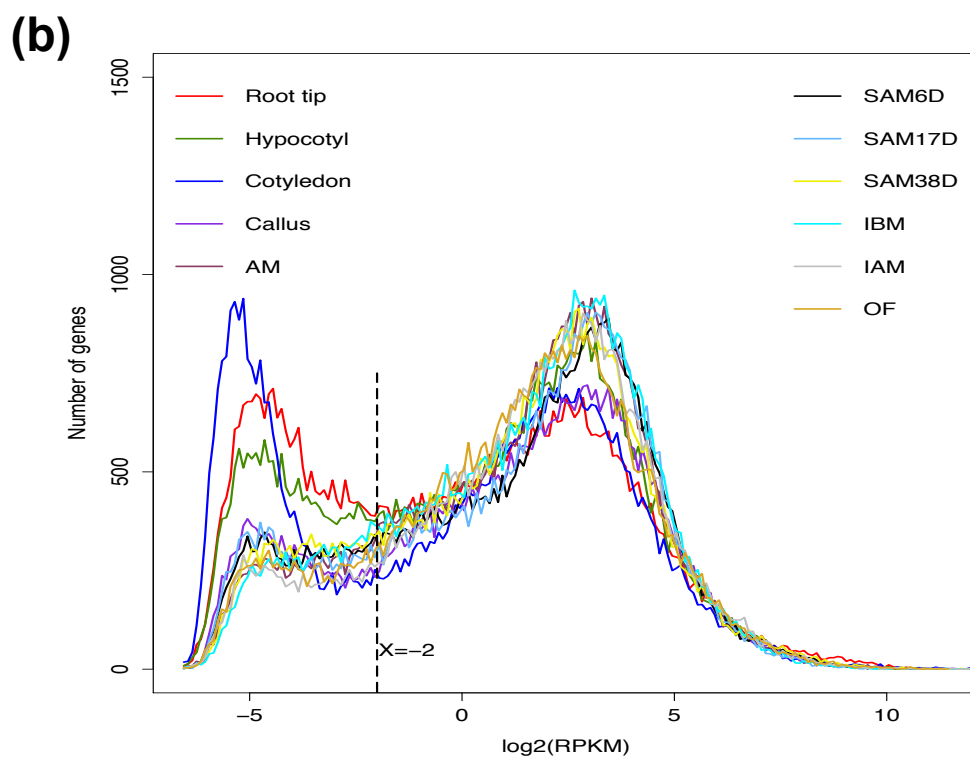

Figure S3

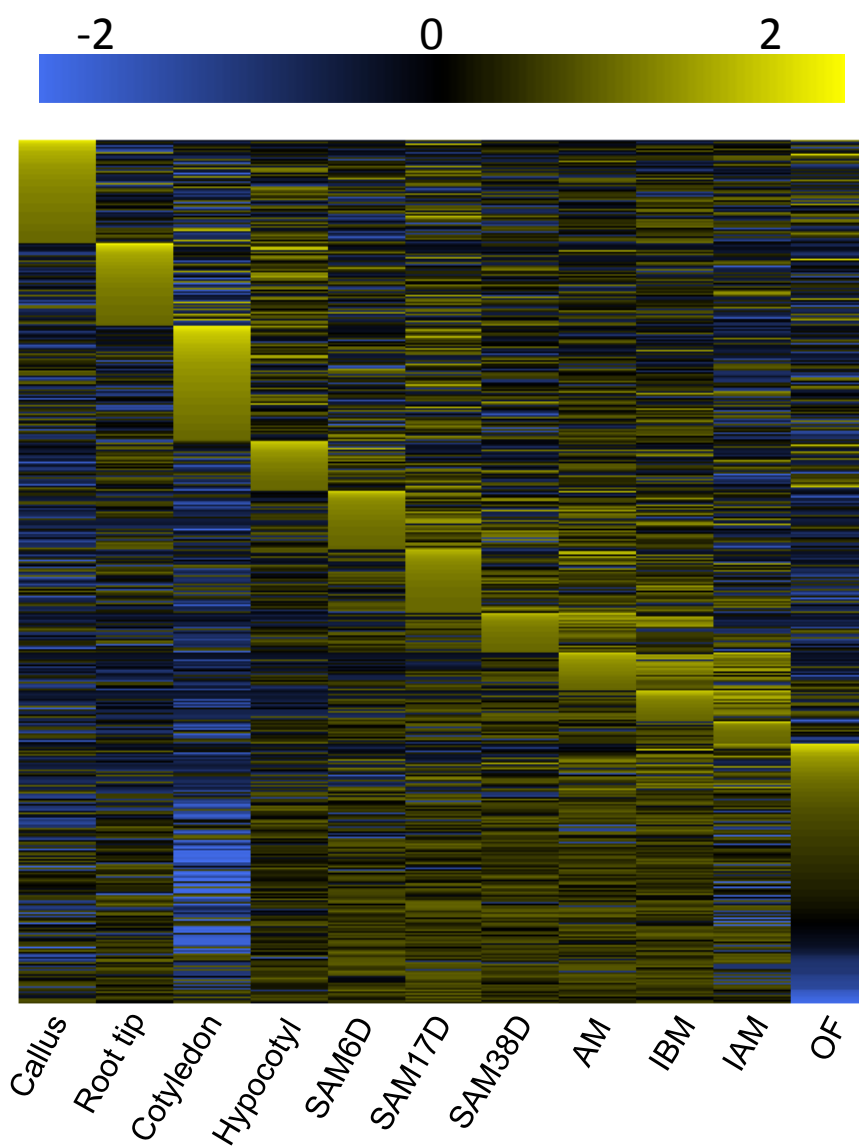

Figure S4

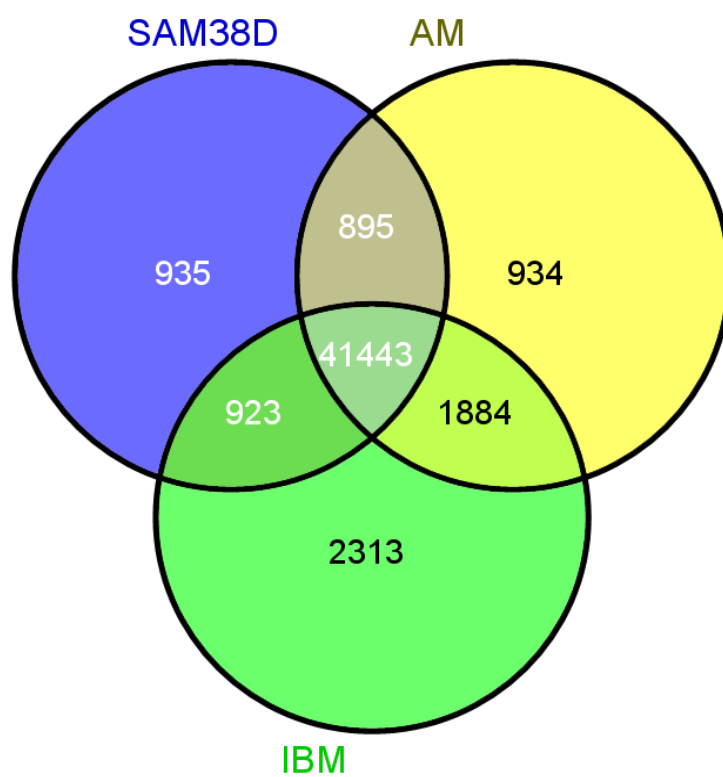

FigureS5

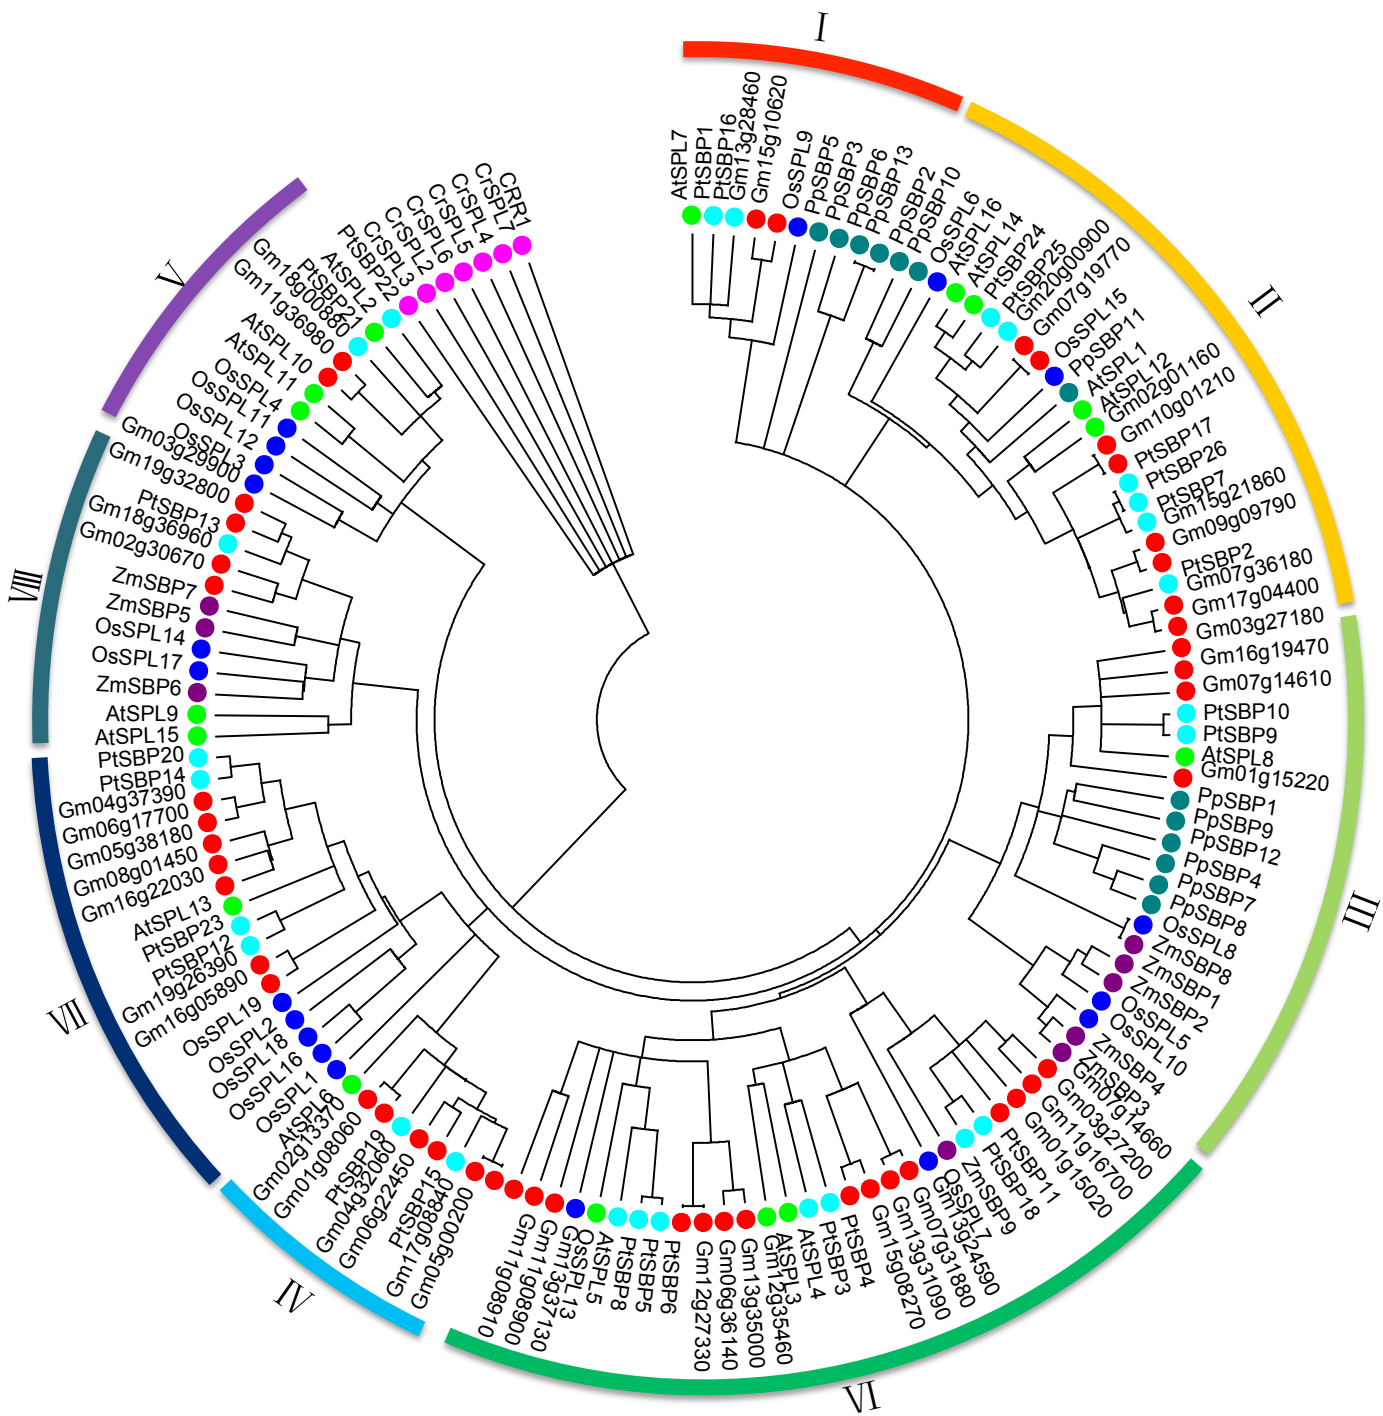

Supplement: 1471-2229-14-169-S1.pdf [file 1471-2229-14-169-S1.pdf]
